# Supplementary material
Source: PubMed Central journal article supplement (PMC4786912)
Supplement: mt2015192x1.pdf [file mt2015192x1.pdf]

## Supplementary Material

**Movie S1.** Osmotic shock-induced calcium sparks in non-transfected *mdx* muscle fibers.

**Movie S2.** Osmotic shock-induced calcium sparks in Cas9/gRNA-transfected *mdx* muscle fibers.

**Table S1.** List of the plasmids used in this study.

| Plasmid Construction               |                              |                |                             |
|------------------------------------|------------------------------|----------------|-----------------------------|
| Plasmid name                       | Plasmid                      |                | Insert                      |
|                                    | Vector                       | cutting site   | Template                    |
| pLKO-gRNA Temp                     | pLKO                         | Nde1 and EcoR1 | synthesized minigene        |
| pLKO gRNA                          | pLKO-gRNA Temp               | Sac2 and Kpn1  | pEGFP-C1                    |
| pLKO-gRNA i20                      | pLKO gRNA                    | Bsmb1          |                             |
| pLKO-gRNA i23                      | pLKO gRNA                    | Bsmb1          |                             |
| pShuttle-gRNA i20                  | pshuttle                     | Not1 and Hind3 | pLKO-gRNA i20               |
| pShuttle-gRNA i23                  | pshuttle                     | Not1 and Hind3 | pLKO-gRNA i23               |
| pCDNA3.3-gRNA-GFP-E2A-hCas9        | addgene Plasmid #41815       | Mlu1 and Sbf1  | PCR1 2 3                    |
|                                    |                              |                | PLKO-gRNA                   |
| pLOX-hcas9 Temp                    | pLOX-Tert-Partial            | Snab1 and Xma1 | addgene Plasmid #41815      |
| pLOX-hcas9                         | pLOX-hcas9 Temp              | BamH1 and Kpn1 | addgene Plasmid #41815      |
|                                    |                              |                | pLOX-CWBmi1                 |
| pLOX-EGFP-2A-hCas9                 | pLOX-hcas9                   | Snab1 and Sbf1 | pCDNA3.3-gRNA-GFP-E2A-hCas9 |
| pshuttle-GFP-E2A-hCas9             | pShuttle-CMV                 | Snab1 and Kpn1 | pLOX-EGFP-2A-hCas9          |
| pCDNA3.3-i20 gRNA-GFP-E2A-hCas9    | CDNA3.3-gRNA-GFP-E2A-hC      | Bsmb1          |                             |
| pCDNA3.3-i23 gRNA-GFP-E2A-hCas9    | CDNA3.3-gRNA-GFP-E2A-hC      | Bsmb1          |                             |
| CDNA3.3-i20 gRNA-mCherry-E2A-hCas9 | CDNA3.3-i20 gRNA-mCherry-E2A | Nhe1 and BsrG1 | pmCherry-C1                 |
| CDNA3.3-i23 gRNA-mCherry-E2A-hCas9 | CDNA3.3-i23 gRNA-mCherry-E2A | Nhe1 and BsrG1 | pmCherry-C1                 |
|                                    |                              |                |                             |
|                                    |                              |                |                             |
|                                    |                              |                |                             |
|                                    |                              |                |                             |

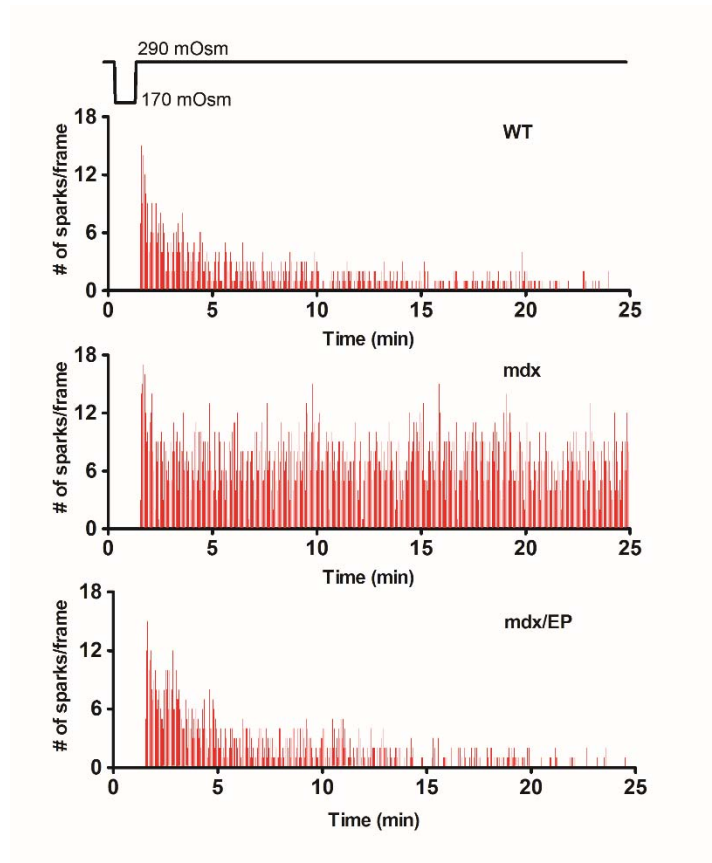

**Figure S1.** Representative plots of calcium sparks per frame over the 25-minute recording period in isolated FDB muscle fibers of WT, mdx and mdx electroporated with CRISPR plasmids (mdx/EP).

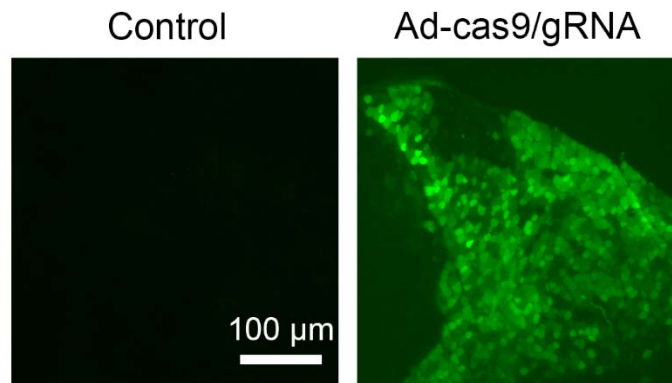

**Figure S2.** Fluorescence images of GFP fluorescence in the GA muscles of newborn pups two weeks after intramuscular injection with or without cas9/gRNA adenovirus. GFP fluorescence is shown as green. Scale bar: 100 μm. The images are representative of five mice.

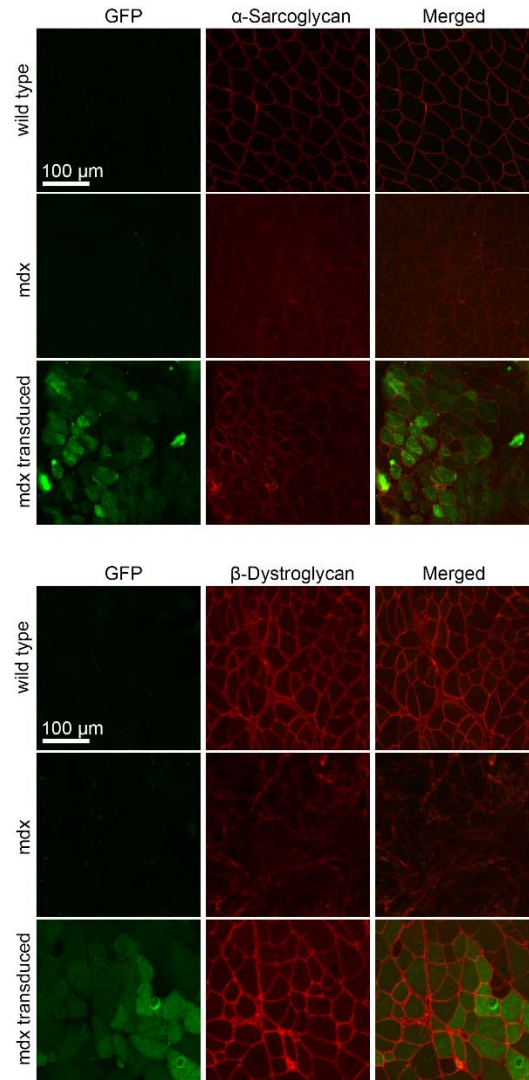

**Figure S3.** Confocal immunofluorescence images of  $\alpha$ -sarcoglycan (a, red) and  $\beta$ -dystroglycan (b, red) in muscle cryosections treated with or without EGFP-2A-cas9/gRNA adenovirus. GFP was shown in green. The images are representative of five experiments.

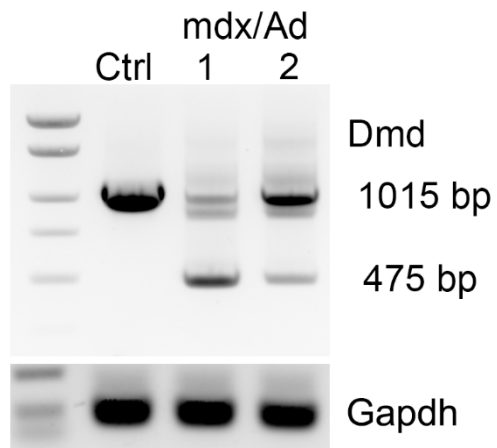

**Figure S4.** RT-PCR analysis of the total RNA extracted from the gastrocnemius muscles injected with EGFP-2A-Cas9/gRNA adenovirus (*mdx/Ad*). Lane 1 and 2 correspond to two different mice.

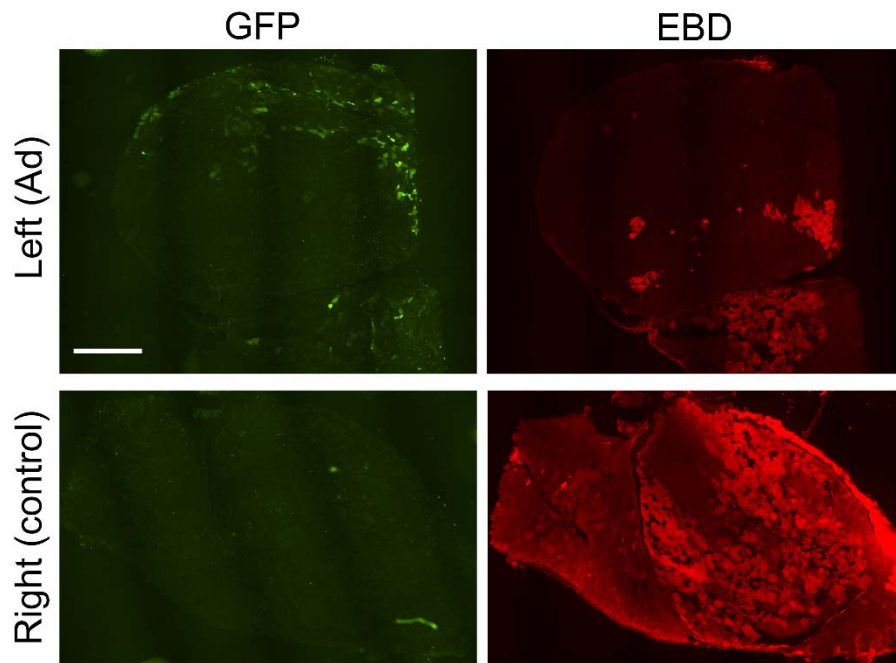

**Figure S5.** EBD fluorescence micrograph of the entire cross section of both gastrocnemius muscles (the left side was injected with cas9/gRNA adenovirus and the contralateral side was used as control) from the same *mdx* mouse after downhill treadmill running exercise. Scale bar: 1 mm.
